# Supplementary material for: Fabrication of metallic patterns on highly curved substrates via nanoimprint lithography in association with an etch-in process
Source: Royal Society of Chemistry journal article supplement (doi:10.1039/c6tc03392j), 2016-01-01
Supplement: c6tc03392j1.pdf [file c6tc03392j1.pdf]

Supplementary Information

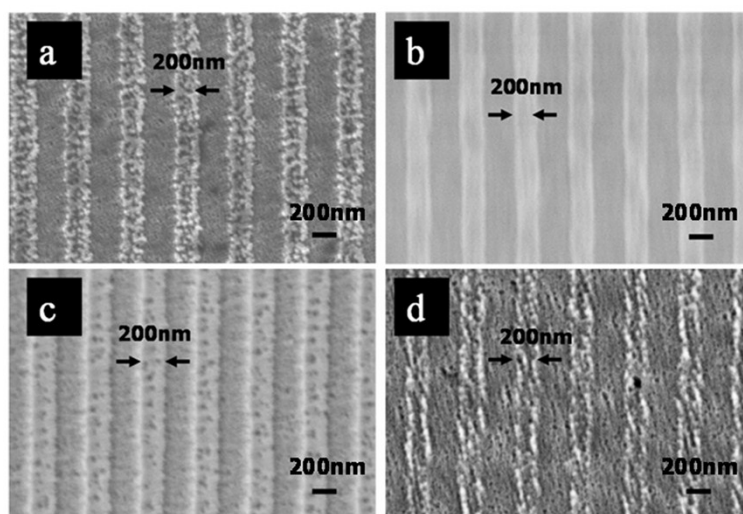

Fig.1 Cr gratings fabricated by chemical etching for different time: a) 60s; b) 120s; c) 180s; d) 240s.

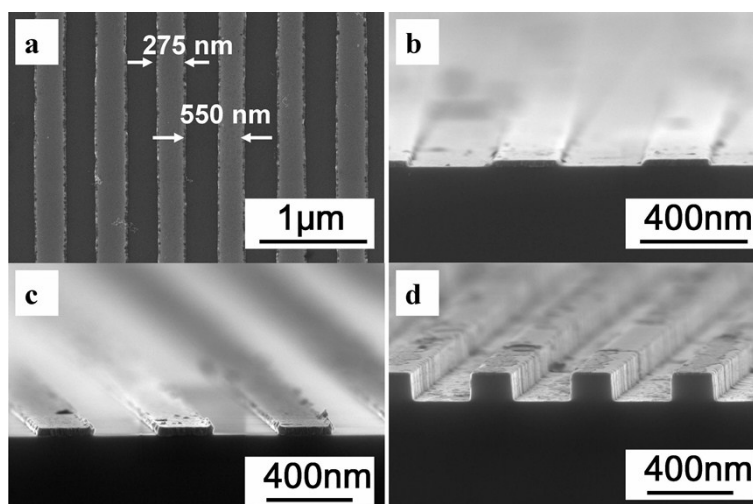

Fig. 2. a)-b) are top view and cross section SEM images of 550nm pitch Cr grating with a groove depth of 70nm made by an optimized procedure; c) is an SEM image of Cr grating made by the lift-off process; d) Si grating fabricated via RIE with a groove depth of 280 nm using the Cr grating in Figure 2b as the RIE mask.
